# Supplementary material
Source: MDPI journal article supplement (https://www.mdpi.com/2311-7524/10/4/415)
Supplement: s1 [file s1]

**Supplemental Table S1:** Sequences of primers related to qRT-PCR amplification.

| Primer name    | Sequence                     | Length |
|----------------|------------------------------|--------|
| <i>C4H1.F</i>  | 5'-GCTGGAAGAAACCTGAAGAG-3'   | 168 bp |
| <i>C4H1.R</i>  | 5'-CTAAACGACCGATGGTAATTC-3'  |        |
| <i>C4H2.F</i>  | 5'-TGCTAACAACCCTGAGAAC-3'    | 184 bp |
| <i>C4H2.R</i>  | 5'-CAACCGTCCAATCGTTATCC-3'   |        |
| <i>FLS.F</i>   | 5'-TTCAGGTTTGGAGCAATGACAG-3' | 138 bp |
| <i>FLS.R</i>   | 5'-GTCTGCCAGCTCCTCCATAG-3'   |        |
| <i>Actin.F</i> | 5'-TGAATGTCCCTGCTGTTTG-3'    | 142 bp |
| <i>Actin.R</i> | 5'-ACCTTCCGCATAACTTTACC-3'   |        |
